# Supplementary material
Source: ML conference proceedings conference paper supplement (https://aclanthology.org/D16-1045)
Supplement: Attachment [file D16-1045.Attachment.zip]

Archive with 1 entries (1 files):
- emnlp-2016-sup-material (1).pdf
